# Supplementary material
Source: PubMed Central journal article supplement (PMC6943353)
Supplement: ajcr0009-2650-f8.pdf [file ajcr0009-2650-f8.pdf]

# Carcinogenic role of FGFBP1 in PDAC

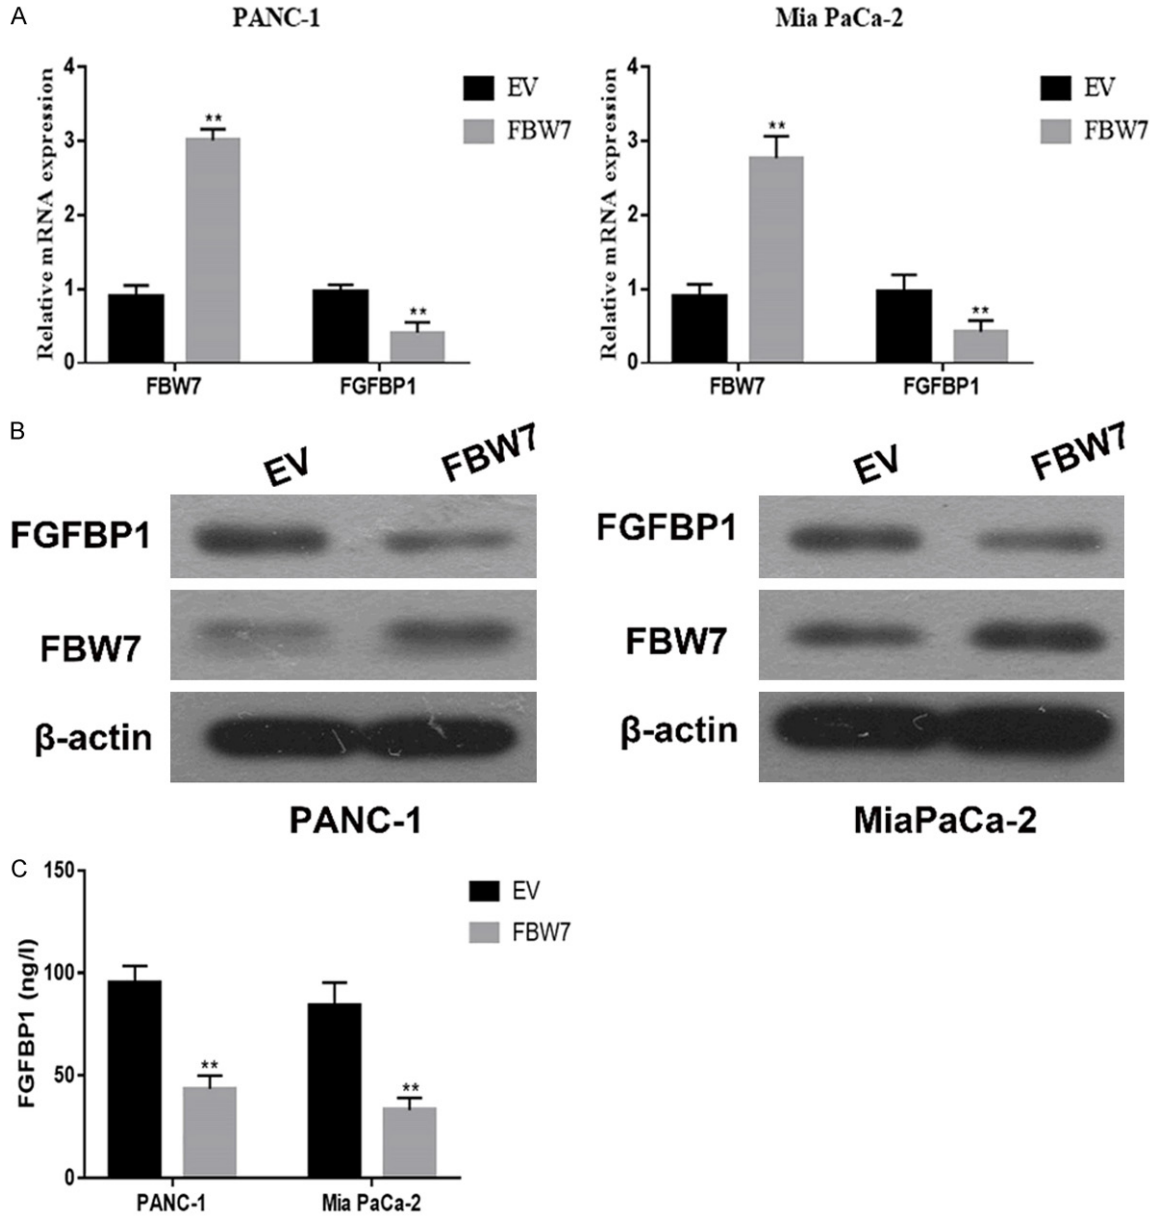

**Figure S1.** Correlation between FGFBP1 and FBW7 expression. A. The mRNA levels of FGFBP1 in FBW7-overexpressing pancreatic cancer cell lines were measured by real-time PCR. B. The protein expression of FGFBP1 was analyzed by Western blotting following treatment. C. The secretion levels of FGFBP1 were evaluated by ELISA.
